# Supplementary material
Source: PubMed Central journal article supplement (PMC3090259)
Supplement: NIHMS287474-supplement-1_si_001.pdf [file NIHMS287474-supplement-1_si_001.pdf]

# Supporting Information For:

## Criterion for amino acid composition of defensins and antimicrobial peptides based on geometry of membrane destabilization

*Nathan W. Schmidt,<sup>†,‡</sup> Abhijit Mishra,<sup>‡,§</sup> Ghee Hwee Lai,<sup>†,‡</sup> Matthew Davis,<sup>§</sup> Lori K. Sanders,<sup>§</sup> Dat Tran,<sup>□</sup> Angie Garcia,<sup>□</sup> Kenneth P. Tai,<sup>□</sup> Paul B. McCray, Jr.,<sup>#</sup> André J. Ouellette,<sup>□</sup> Michael E. Selsted,<sup>□</sup> Gerard C. L. Wong,<sup>\*,†,‡,§</sup>*

<sup>†</sup>Department of Physics, University of Illinois, Urbana-Champaign, IL 61801

<sup>‡</sup>Department of Bioengineering, University of California, Los Angeles, CA 90095

<sup>§</sup>Department of Materials Science, University of Illinois, Urbana-Champaign, IL 61801

<sup>□</sup>Department of Pathology & Laboratory Medicine, USC Norris Cancer Center, Keck School of Medicine of the University of Southern California, Los Angeles, CA 90089-9601

<sup>#</sup>Department of Pediatrics, Carver College of Medicine, University of Iowa, Iowa City, IA 52242

Email: [gclwong.ucla@gmail.com](mailto:gclwong.ucla@gmail.com)

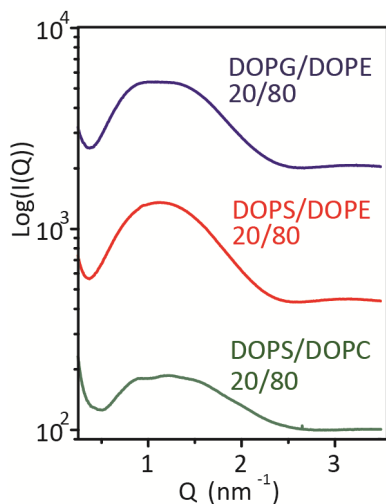

**Figure S1:** SAXS measurements on membranes used in this study show broad features consistent with the form factor from lipid bilayers indicating the presence of SUVs. Samples are in 100mM NaCl solution.

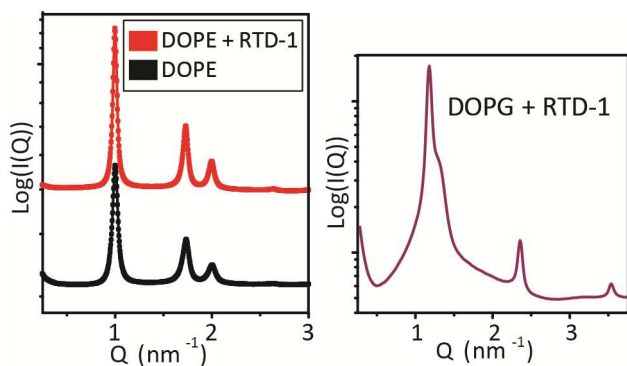

**Figure S2:** RTD-1 interacts differently with different lipid species. Virtually identical scattering profiles for DOPE only and DOPE+RTD-1 demonstrate RTD-1 weakly interacts with DOPE, and does not drastically reorganize DOPE lipids. RTD-1 strongly interacts with DOPG, and mediates adhesion between DOPG membranes into a  $L_\alpha$  lamellar phase with  $d = 5.3\text{nm}$ . Replacement of DOPG with DOPS gives similar results. Since RTD-1 generates a  $Pn3m$  cubic phase only in composite DOPG:DOPE membranes this indicates both lipids play an essential role in curvature generation.

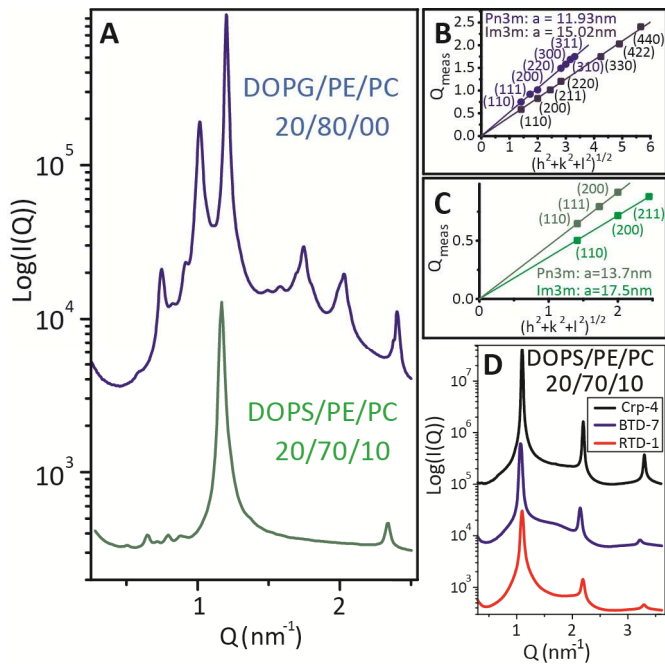

**Figure S3:** Generation of negative Gaussian curvature by protegrin-1 requires less membrane PE content. Protegrin-1 (PG-1) is an 18 amino acid amphipathic cathelicidin which resembles  $\theta$ -defensins both sequentially and structurally. All six of its cationic residues are arginine, and its sheet structure is largely conferred from two intra-disulfide bonds from four cysteine residues. (A) PG-1 restructures vesicles with high amounts of PE, DOPG/DOPE = 20/80, and reduced amounts, DOPS/DOPE/DOPC = 20/70/10, into coexisting Pn3m and Im3m cubic phases. For the 80% PE condition (B),  $a_{\text{Pn3m}} = 11.91$  nm and  $a_{\text{Im3m}} = 15.02$  nm, with ratio  $a_{\text{Im3m}}/a_{\text{Pn3m}} = 1.26$ , which is close to the Bonnet ratio of 1.279 for coexisting cubic phases, and (C)  $a_{\text{Pn3m}} = 13.7$  nm and  $a_{\text{Im3m}} = 17.5$  nm, for the 70% PE condition (C). The calculated lattice parameters,  $a$ , for the coexisting cubic phases show  $a$  increases with decreasing PE. Since  $a$  is inversely related with the amount of negative Gaussian curvature,  $K$ , this implies large  $K$  is easier to produce in PE rich membranes. (D) None of the defensins measured at DOPS/DOPE/DOPC = 20/70/10 induced a cubic phase. Crp-4, BTD-7, and RTD-1 generate lamellar phases,  $d = 5.7$ nm,  $5.9$ nm, and  $5.7$ nm, respectively, with zero Gaussian curvature in membranes with reduced PE. The lower threshold PE concentration necessary for PG-1 to generate cubic phases may explain its reduced specificity compared with defensins. P/L = 1/30, for PG-1, RTD-1, and BTD-7, and 1/45 for Crp-4.
